# Supplementary material
Source: PubMed Central journal article supplement (PMC3220553)
Supplement: supp_M111.287011_jbc.M111.287011-1.pdf [file supp_M111.287011_jbc.M111.287011-1.pdf]

**A**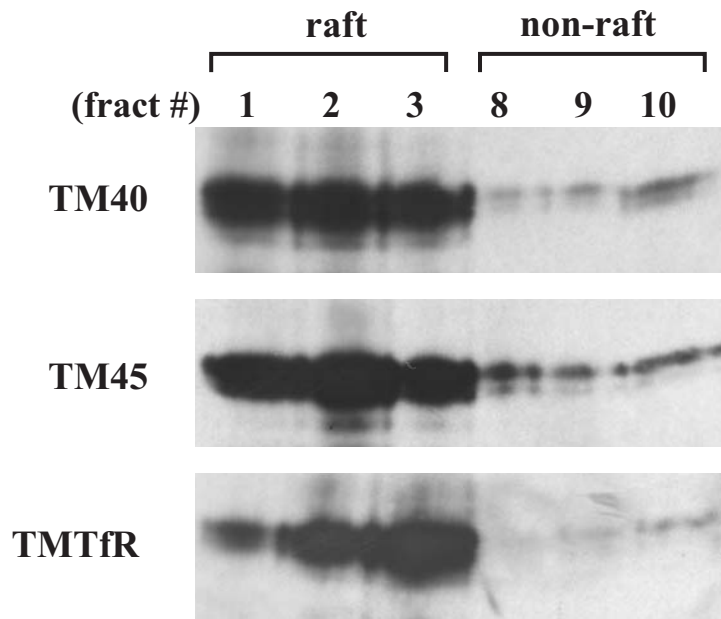**B**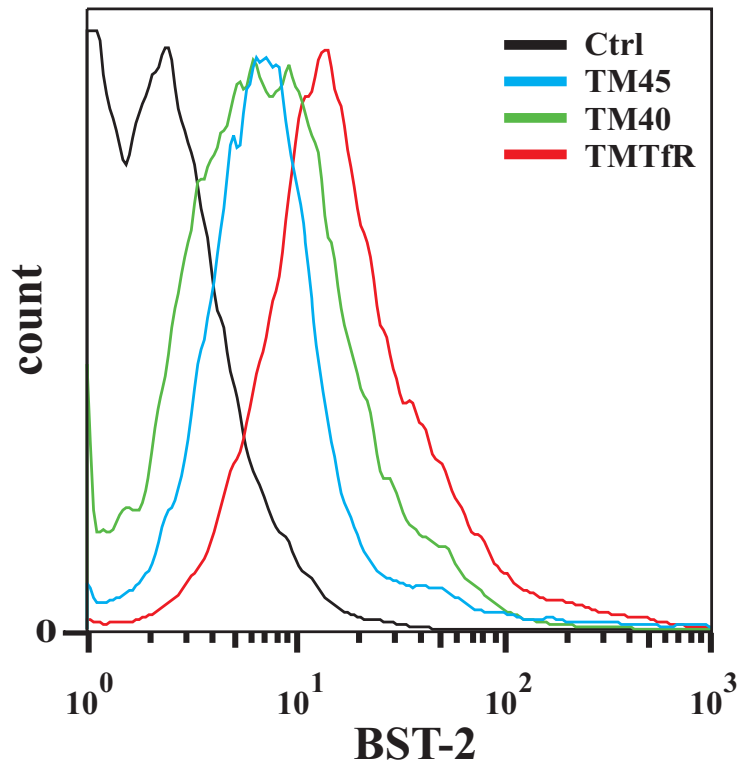

**Supplemental Figure 1: Replacement of the putative GPI anchor signal in BST-2 by heterologous TM segments does not abolish raft association or cell-surface expression of BST-2.** (A) 293T cells were transfected with 0.5  $\mu$ g of BST-2 variants TM40, TM45, or TMTfR, respectively. Samples were adjusted to 5  $\mu$ g total DNA with empty vector DNA. Samples were processed for floatation analysis as described in Experimental Procedures and 10 equal fractions were collected from the top of the gradient containing Triton X-100. Only fractions 1-3, representing lipid raft fractions; and fractions 8-10, representing non-raft fractions are shown. BST-2 was identified by immunoblot analysis using a BST-2-specific polyclonal antibody. (B) 293T cells were transfected with 0.5  $\mu$ g each of TM40, TM45, or TMTfR variants together with 1  $\mu$ g each of pEGFP-N1. All samples were adjusted to 5  $\mu$ g total DNA with empty vector DNA. Cells were harvested 24 hr after transfection and stained with an antibody to BST-2. As a control, 293T cells were transfected with pEGFP-N1 and empty vector in the absence of BST-2 and stained with an isotype control (Ctrl). Samples were subjected to FACS analysis as described in Experimental Procedures and gated for GFP-positive cells.
